# Supplementary material for: Lipopolysaccharide-coated CuS nanoparticles promoted anti-cancer and anti-metastatic effect by immuno-photothermal therapy
Source: PubMed Central journal article supplement (PMC5739661; doi:10.18632/oncotarget.22331), 2017-11-06
Supplement: oncotarget-08-105584-s001.pdf [file oncotarget-08-105584-s001.pdf]

## Lipopolysaccharide-coated CuS nanoparticles promoted anti-cancer and anti-metastatic effect by immuno-photothermal therapy

### SUPPLEMENTARY MATERIALS

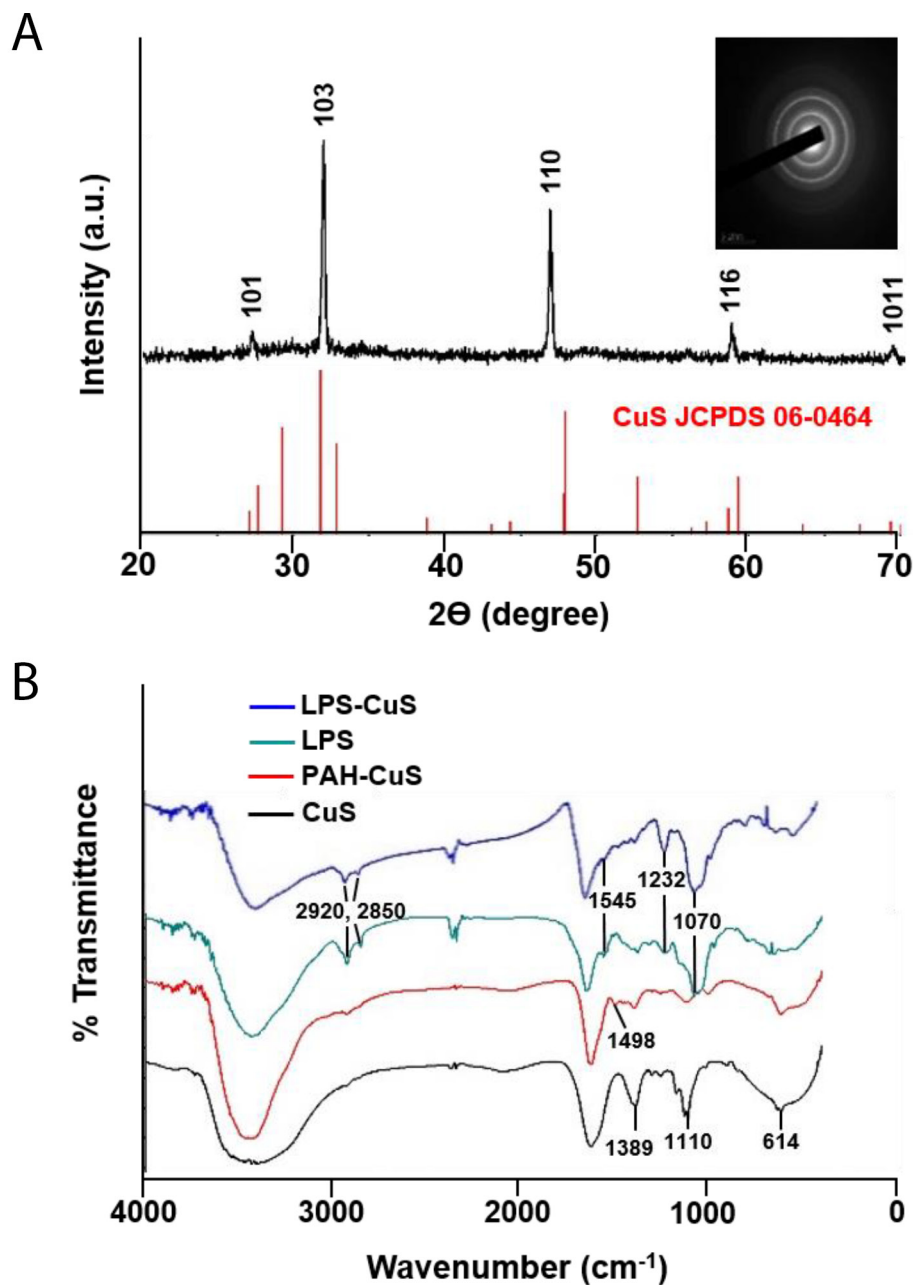

**Supplementary Figure 1: Characteristics of LPS-CuS.** (A) XRD pattern of CuS with the standard JCPDS card 06-0464 of CuS. (B) FT-IR spectra of CuS (black), PAH-CuS (red), LPS only (green), and LPS-CuS (blue).

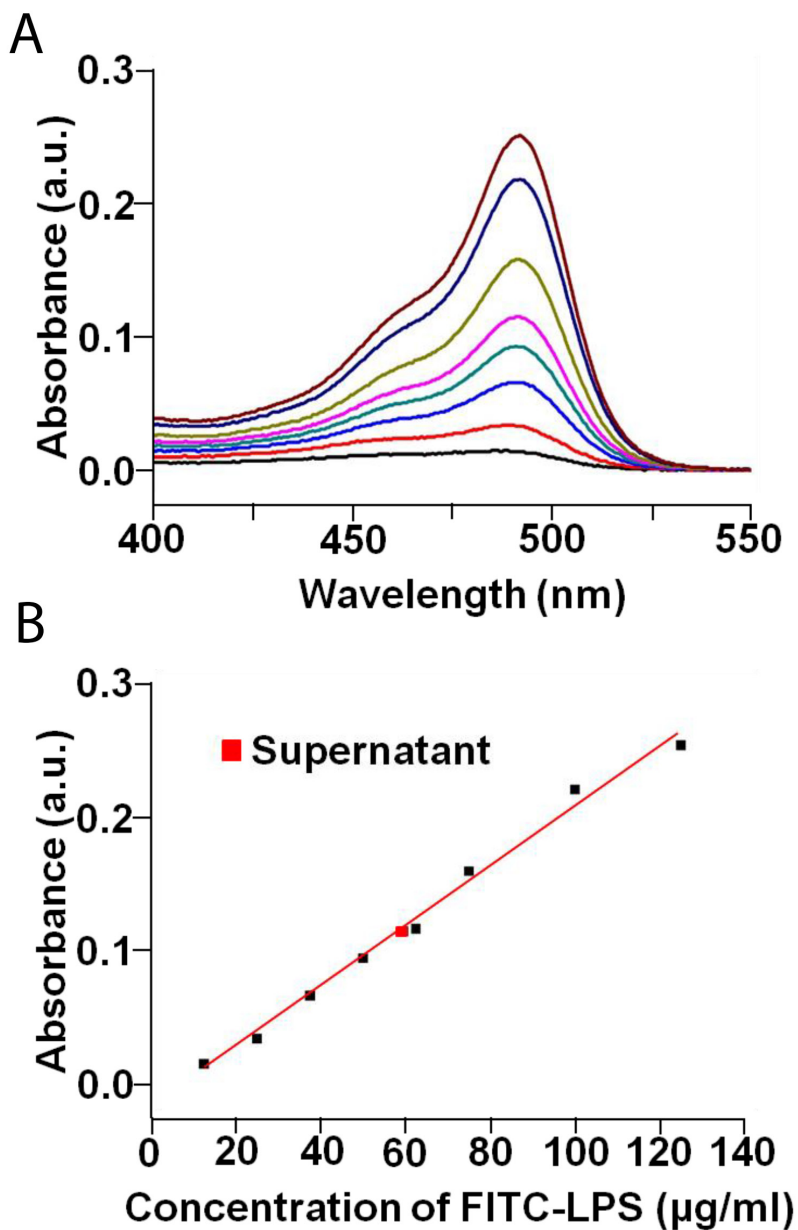

**Supplementary Figure 2: Quantification of LPS coating onto NPs.** (A and B) Calibration curves for the UV absorption of corresponding FITC-labeled LPS concentrations. The UV absorbance of uncoated free FITC-LPS was measured to calculate the concentration of coated LPS.

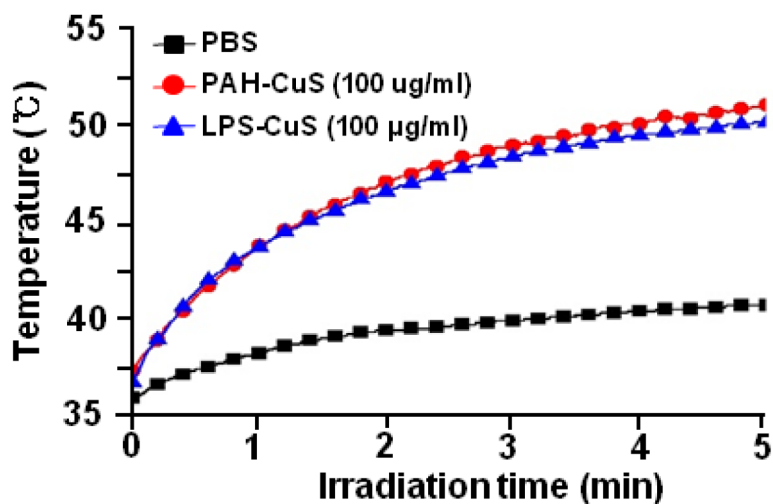

Supplementary Figure 3: Photothermal heating curves of PAH-CuS (red) and LPS-CuS (blue) with different concentration dissolved in PBS irradiated using 808 nm laser with power density of 1W/cm<sup>2</sup> for 5 min.

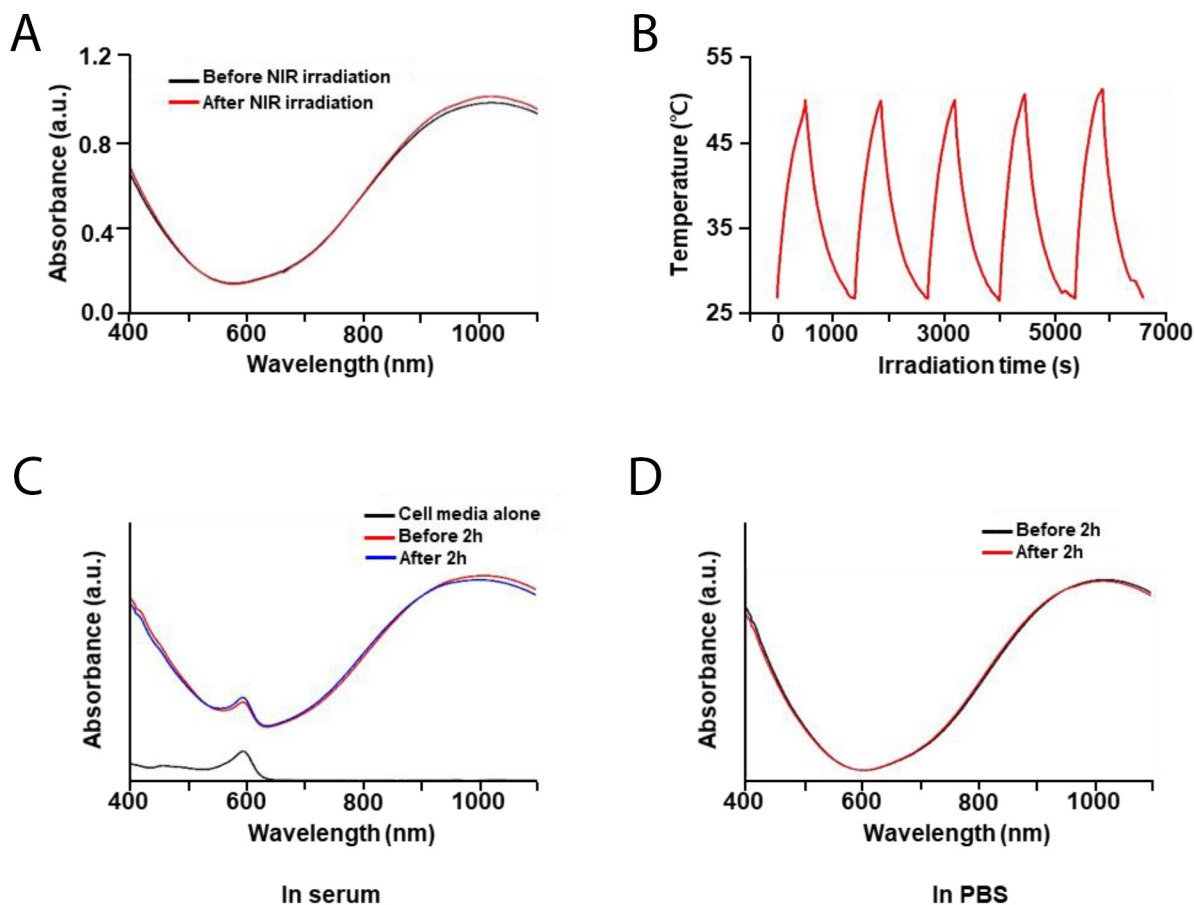

Supplementary Figure 4: Photostability test of LPS-CuS. (A) UV-vis absorption of LPS-CuS before (black) and after (red) NIR-irradiation. (B) Photothermal heating curves of LPS-CuS (50µg/mL) during the successful 5 cycles of the laser ON/OFF mode (808 nm laser, 1W/cm<sup>2</sup>). The stability of LPS-CuS in (C) serum contained culture medium and (D) PBS were measured by UV-vis absorption.

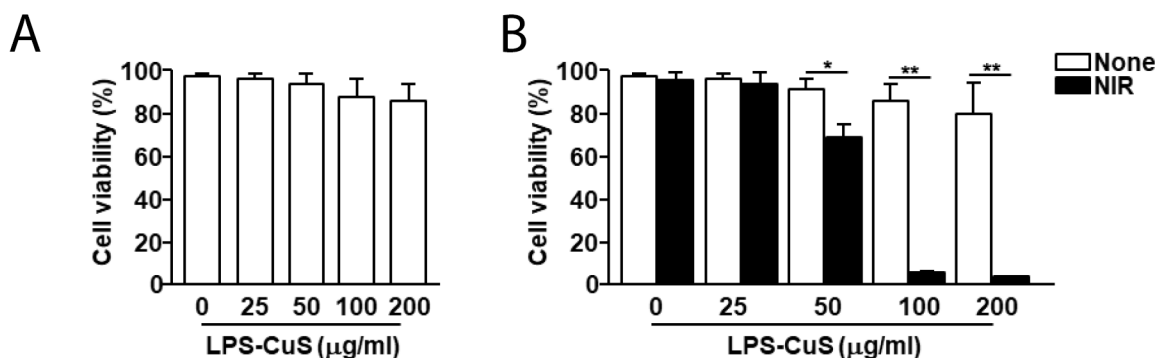

**Supplementary Figure 5: Cytotoxic effect of LPS-CuS.** (A) L132 cells were treated with an indicated concentration of LPS-CuS for 24 h. (B) CT26 cells ( $2 \times 10^5$ ) were treated with an indicated concentration of LPS-CuS, and the cells were irradiated for 5 min with an 808 nm laser. Cell viability was analyzed by MTT assay.

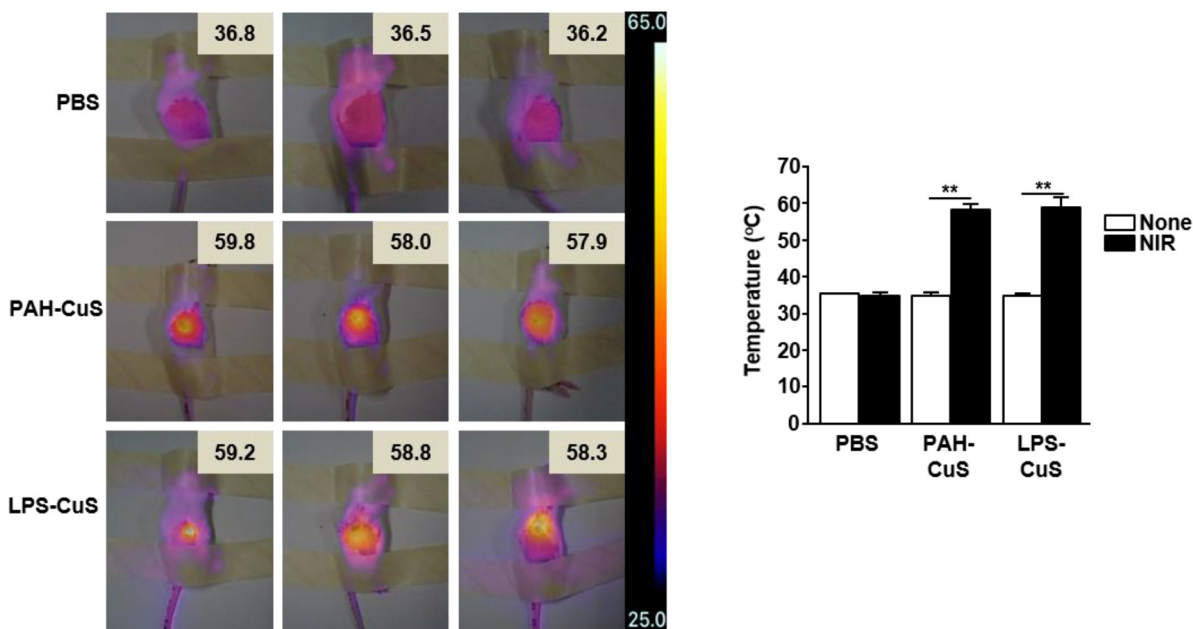

**Supplementary Figure 6: Photothermal effect of LPS-CuS in vivo.** BABL/c mice were subcutaneously (*s.c.*) injected with  $1 \times 10^6$  CT26. Once CT26 tumors were established on day 7, the mice received an intratumoral (*i.t.*) injection of PBS, 5 mg/kg PAH-CuS and 5 mg/kg LPS-CuS. Two hours after treatment, the mice were irradiated with 808 nm laser at  $1 \text{ W/cm}^2$  for 5 min and the temperature increases were observed by IR camera.

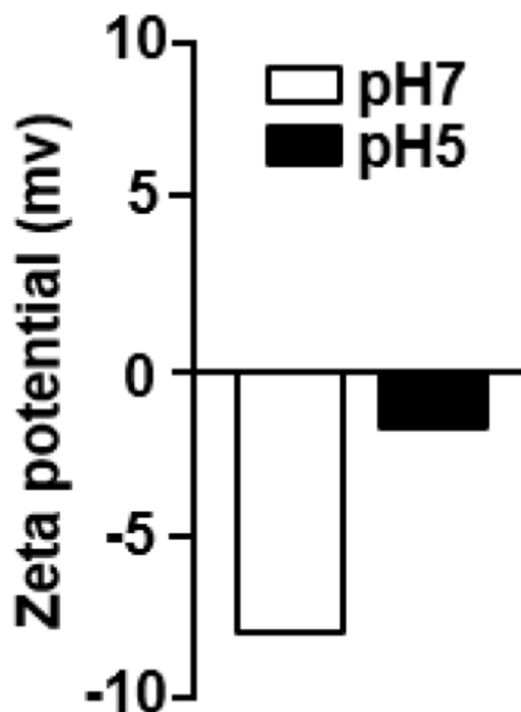

**Supplementary Figure 7: Release feature of LPS from NPs.** Zeta potential value of LPS-CuS changed from -8.23 (at pH 7) to -2.26 (after 2h exposure at pH 5).

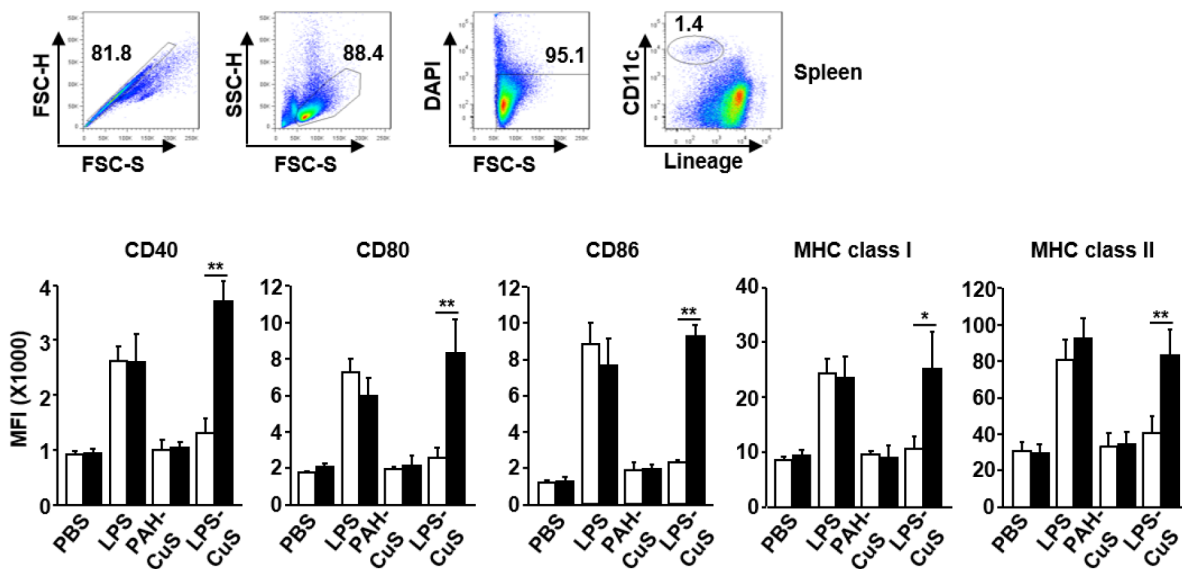

**Supplementary Figure 8: LPS-CuS treatment with laser irradiation promoted activation of spleen DC.** CT26 tumor-bearing BABL/c mice were intratumorally injected with PBS, PAH-CuS and LPS-CuS for 2 h and treated with or without laser irradiation. Twenty-four hours after treatment the spleen were harvested and measured activation marker on the surface. The spleen DCs were defined as a lineage-CD11c+ cells in live leukocytes (upper panel). MFI of co-stimulatory molecules and MHC class I and II expression were shown (lower panel). All data are representative of, or the average of, analyses of six independent samples (i.e., three samples per experiment, two independent experiments).

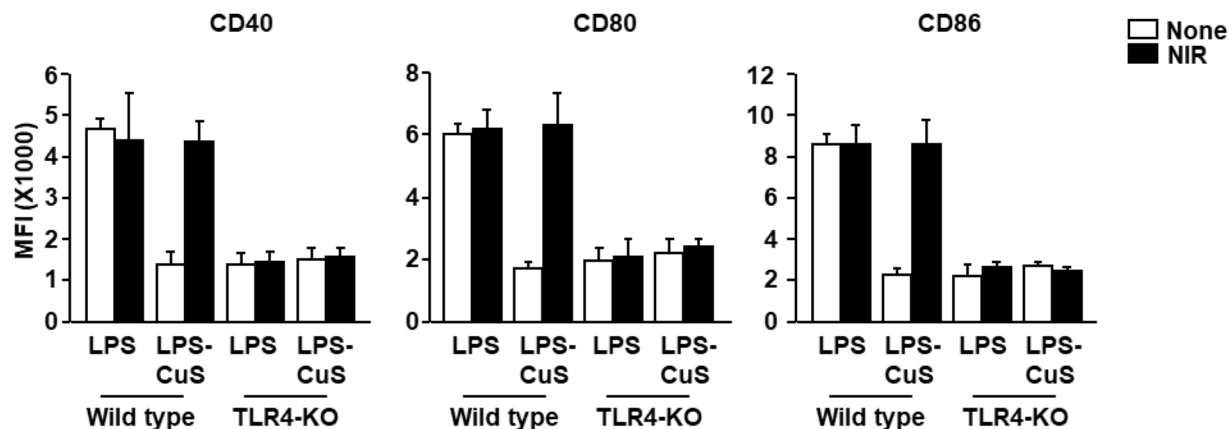

**Supplementary Figure 9: TLR4 dependent DC activation by LPS-CuS.** C57BL/6 mice (wild type) and TLR4-KO mice were s.c. inoculated  $1 \times 10^6$  B16 cells. Once the tumors were established on day 10, the mice were treated with LPS and LPS-CuS for 2 h and irradiated with laser for 5 min. The DC activation in tumor drLN were analysed by flow cytometry after 24 h of treatment. All data are representative of, or the average of, analyses of six independent samples (i.e., three samples per experiment, two independent experiments).

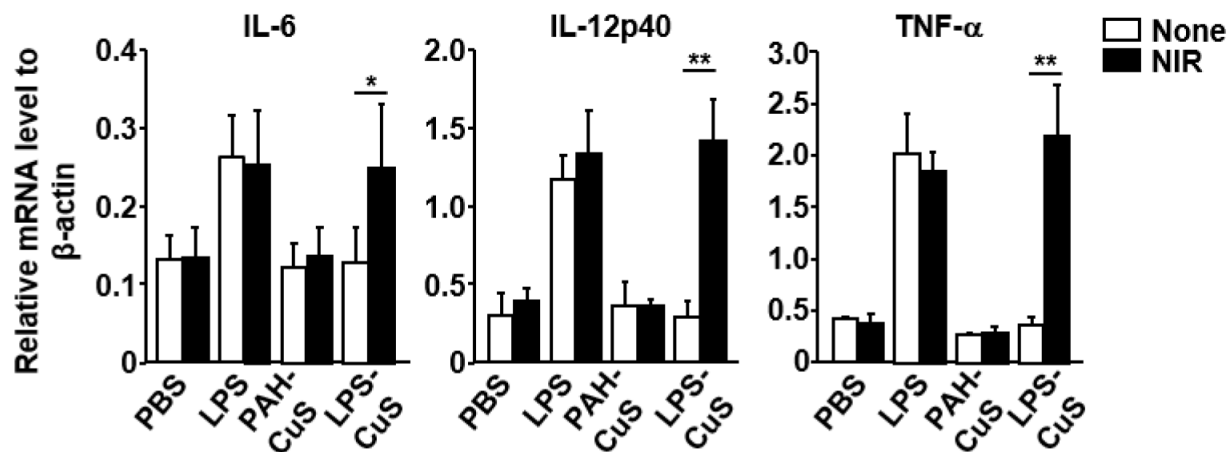

**Supplementary Figure 10: LPS-CuS treatment with laser irradiation promoted up-regulation of mRNA of pro-inflammatory cytokines.** The mRNA of indicated cytokines in tumor draining lymph node (drLN) was measured by Real-time PCR 24 h after treatment of PBS, LPS, PAH-CuS and LPS-CuS with or without laser irradiation. Data are the average of analyses of six independent samples.

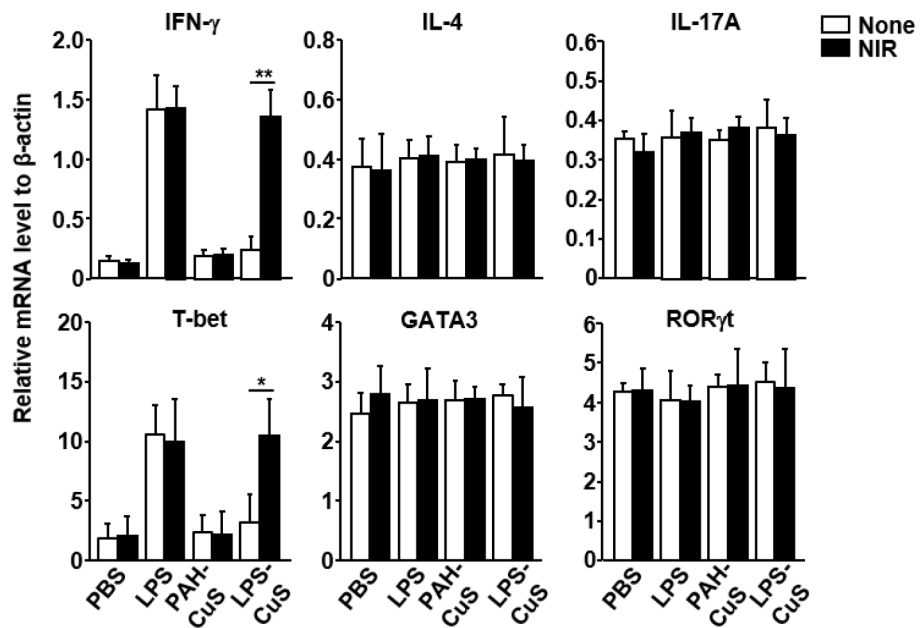

**Supplementary Figure 11: LPS-CuS treatment with laser irradiation induced Th1 immune responses.** The mice were treated with PBS, LPS, PAH-CuS and LPS-CuS as indicated in Figure 4. The mRNA levels in the spleen were measured 24 hours after treatment. The data are the average of analyses of six independent samples.
